# Supplementary material for: Analyzing the Economic Development-Driven Ecological Deficit in the EU-15 Countries: New Evidence From PSTR Approach
Source: Research Square preprint supplement (doi:10.21203/rs.3.rs-425406/v1), 2021-05-04
Supplement: Supplementary file 1 [file 1ff0d4a8f020656140b359c3.xlsx]

## Sheet: Data
Country	id	Year	Deficit_Carbon	Deficit_Cropland	Deficit_Fishing Grounds	Deficit_Forest Products	Deficit_Grazing Land	Deficit_Total	LnGDPper	ADR	Urban	LnEnergyUse
Austria	1	1995	-3.57382	-0.146715	-0.042159	1.58237	-0.0471651	-2.22749	10.3113	49.0474	61.596	8.12374
Austria	1	1996	-4.15891	-0.154148	-0.0414317	1.52976	-0.0296746	-2.85441	10.3325	49.1195	61.32	8.18324
Austria	1	1997	-3.76734	-0.151243	-0.0446743	1.47068	-0.0319732	-2.52455	10.3758	48.836	61.045	8.17482
Austria	1	1998	-3.75624	-0.125849	-0.0488479	1.58121	-0.0330177	-2.38274	10.4317	48.3286	60.768	8.19052
Austria	1	1999	-3.6683	-0.093302	-0.044357	1.4927	-0.0671862	-2.38044	10.4613	47.8438	60.491	8.18641
Austria	1	2000	-3.76116	-0.146162	-0.0385709	1.47593	-0.0658227	-2.53578	10.4918	47.5297	60.213	8.18046
Austria	1	2001	-3.95748	-0.161729	-0.0427947	1.55223	-0.0680545	-2.67783	10.4685	47.3256	59.934	8.23176
Austria	1	2002	-4.00715	-0.110444	-0.0395009	1.66686	-0.0603887	-2.55062	10.4795	47.2744	59.655	8.2358
Austria	1	2003	-4.23781	-0.119543	-0.0453657	1.51064	-0.0754405	-2.96752	10.4918	47.3329	59.375	8.28743
Austria	1	2004	-4.29762	-0.142854	-0.0480712	1.49939	-0.0630906	-3.05224	10.5236	47.3987	59.094	8.29594
Austria	1	2005	-4.43447	-0.0855195	-0.0546038	1.42642	-0.0747036	-3.22288	10.5584	47.4254	58.813	8.31522
Austria	1	2006	-4.43355	-0.132013	-0.0561775	1.15104	-0.068669	-3.53937	10.6046	47.6052	58.532	8.31356
Austria	1	2007	-4.36938	-0.193614	-0.0601357	1.20678	-0.0702416	-3.4866	10.6423	47.7524	58.249	8.29894
Austria	1	2008	-4.3394	-0.177253	-0.0567079	1.21978	-0.0843995	-3.43798	10.6665	47.8787	57.966	8.30205
Austria	1	2009	-3.90782	-0.194618	-0.0529197	1.33941	-0.0850546	-2.901	10.6506	48.0158	57.683	8.24227
Austria	1	2010	-4.27135	-0.185315	-0.0550574	1.32269	-0.106946	-3.29598	10.6707	48.1812	57.399	8.30677
Austria	1	2011	-4.34229	-0.212165	-0.0543986	1.24528	-0.117019	-3.4806	10.7116	48.3132	57.115	8.27433
Austria	1	2012	-4.06326	-0.186783	-0.0535927	1.24113	-0.103707	-3.16621	10.7459	48.4584	57.147	8.26533
Austria	1	2013	-4.0787	-0.212163	-0.0583416	1.18064	-0.104857	-3.27342	10.7483	48.6484	57.336	8.2736
Austria	1	2014	-3.8847	-0.232769	-0.0602214	1.22831	-0.111379	-3.06075	10.7508	48.8843	57.526	8.23306
Austria	1	2015	-3.87127	-0.262258	-0.0585681	1.17413	-0.113029	-3.131	10.792	49.1657	57.715	8.24284
Austria	1	2016	-3.84931	-0.242175	-0.0593407	1.16831	-0.134734	-3.11725	10.823	49.4317	57.905	0
Belgium	2	1995	-4.29872	-0.768208	-0.108798	-0.54645	-0.515864	-6.23804	10.2429	51.0989	96.777	8.56934
Belgium	2	1996	-4.74985	-0.698791	-0.0773471	-0.488448	-0.448866	-6.46331	10.2473	51.5581	96.851	8.61911
Belgium	2	1997	-4.73239	-0.680675	-0.079138	-0.489826	-0.508438	-6.49047	10.3071	51.8962	96.924	8.61676
Belgium	2	1998	-4.95289	-0.729038	-0.0793103	-0.567857	-0.497091	-6.82619	10.3434	52.1372	96.996	8.63109
Belgium	2	1999	-4.6743	-0.696451	-0.0727194	-0.558223	-0.510765	-6.51245	10.3846	52.3325	97.065	8.63279
Belgium	2	2000	-4.75037	-0.721717	-0.0637307	-0.664771	-0.511447	-6.71203	10.4418	52.5141	97.129	8.64283
Belgium	2	2001	-4.87069	-0.751979	-0.0544495	-0.67018	-0.498416	-6.84571	10.4422	52.5497	97.186	8.63661
Belgium	2	2002	-4.6229	-0.872224	-0.0547455	-0.568116	-0.516564	-6.63455	10.4549	52.6038	97.241	8.59243
Belgium	2	2003	-4.86406	-0.795979	-0.0708398	-0.583762	-0.502367	-6.817	10.4504	52.6524	97.296	8.62874
Belgium	2	2004	-4.92132	-0.679081	-0.0698377	-0.445941	-0.533342	-6.64952	10.472	52.6362	97.35	8.62927
Belgium	2	2005	-5.04957	-0.755593	-0.0334368	-0.584302	-0.494938	-6.91784	10.5019	52.5347	97.403	8.62256
Belgium	2	2006	-5.10861	-0.769789	-0.0174821	-0.503466	-0.542711	-6.94206	10.5346	52.4688	97.454	8.60712
Belgium	2	2007	-5.06591	-0.807646	-0.0374315	-0.452349	-0.520558	-6.88389	10.5697	52.2774	97.505	8.58241
Belgium	2	2008	-5.06453	-0.758788	-0.0482031	-0.36762	-0.463863	-6.70301	10.5886	52.056	97.555	8.60423
Belgium	2	2009	-4.50801	-0.824381	-0.0639556	-0.301473	-0.476199	-6.17402	10.5766	51.9426	97.603	8.55576
Belgium	2	2010	-4.5738	-0.867841	-0.0713788	-0.306658	-0.432615	-6.25229	10.632	52.0144	97.651	8.61965
Belgium	2	2011	-4.1983	-0.924518	-0.0697705	-0.418224	-0.425764	-6.03658	10.6534	52.3287	97.698	8.53549
Belgium	2	2012	-4.19628	-0.95797	-0.0733899	-0.698726	-0.403398	-6.32976	10.672	52.7443	97.744	8.4858
Belgium	2	2013	-4.19555	-0.858088	-0.0772309	-0.705034	-0.386377	-6.22228	10.6647	53.2369	97.789	8.51669
Belgium	2	2014	-4.09942	-1.0257	-0.0818019	-0.398425	-0.379613	-5.98496	10.6663	53.7374	97.833	8.45707
Belgium	2	2015	-3.90914	-0.895937	-0.0699406	-0.217091	-0.381811	-5.47392	10.7016	54.1936	97.876	8.45272
Belgium	2	2016	-3.91402	-0.856982	-0.0782241	-0.275274	-0.341801	-5.4663	10.7255	54.7714	97.919	0
Denmark	3	1995	-4.58897	0.898142	0.805325	-0.615853	-0.25571	-3.75707	10.2491	48.381	84.979	8.21783
Denmark	3	1996	-4.42352	0.950077	0.983052	-0.555736	-0.282087	-3.32821	10.2812	48.7299	85.006	8.33573
Denmark	3	1997	-4.46864	1.03305	0.961157	-0.741309	-0.326889	-3.54264	10.3519	49.0652	85.033	8.25535
Denmark	3	1998	-4.38581	0.97215	0.934146	-1.02011	-0.335064	-3.83469	10.3973	49.3967	85.06	8.23539
Denmark	3	1999	-4.2176	0.895041	0.923691	-1.13487	-0.35053	-3.88426	10.4201	49.7075	85.086	8.18943
Denmark	3	2000	-4.24757	0.809742	0.872347	-1.14141	-0.378939	-4.08584	10.461	49.9773	85.1	8.15755
Denmark	3	2001	-4.26145	0.667491	1.02979	-0.794409	-0.328696	-3.68728	10.4536	50.2406	85.15	8.18422
Denmark	3	2002	-4.20775	0.763057	1.05615	-0.787112	-0.384901	-3.56056	10.4549	50.5053	85.25	8.1705
Denmark	3	2003	-4.33669	0.781694	1.0363	-0.827153	-0.40843	-3.75427	10.4393	50.7585	85.36	8.22358
Denmark	3	2004	-4.34762	0.624489	1.07852	-0.820674	-0.462552	-3.92783	10.4895	50.9987	85.566	8.1879
Denmark	3	2005	-4.30543	0.553803	1.19671	-0.900347	-0.461781	-3.91705	10.5202	51.2417	85.856	8.15698
Denmark	3	2006	-4.4541	0.777066	1.1065	-0.863117	-0.461327	-3.89498	10.5889	51.5684	86.098	8.22367
Denmark	3	2007	-4.33475	0.780049	1.10254	-0.915728	-0.452369	-3.82026	10.6275	51.8915	86.293	8.19495
Denmark	3	2008	-4.40894	0.573671	1.34921	-0.791163	-0.43291	-3.71013	10.6626	52.2258	86.487	8.16095
Denmark	3	2009	-3.75779	0.873843	1.23779	-0.471855	-0.457755	-2.57577	10.6244	52.5775	86.654	8.11049
Denmark	3	2010	-3.77434	1.01052	1.15951	-0.682078	-0.556522	-2.8429	10.6738	52.9459	86.795	8.1636
Denmark	3	2011	-3.87958	0.839282	1.29791	-0.516836	-0.538739	-2.79796	10.6886	53.4748	86.957	8.0803
Denmark	3	2012	-3.75742	0.770457	1.41372	-0.469812	-0.461997	-2.50506	10.6839	53.9838	87.142	8.03644
Denmark	3	2013	-3.74545	0.761617	1.3673	-0.594763	-0.484454	-2.69576	10.6908	54.5866	87.292	8.0473
Denmark	3	2014	-3.43131	0.858606	1.07097	-0.694197	-0.492796	-2.68872	10.6919	55.2868	87.41	7.96296
Denmark	3	2015	-3.47005	0.91168	0.979485	-0.693507	-0.507653	-2.78004	10.7313	55.9834	87.526	7.94329
Denmark	3	2016	-3.30454	0.858238	0.938186	-0.607027	-0.516764	-2.63191	10.7581	56.2982	87.642	0
France	4	1995	-2.94949	0.426472	-0.0807561	0.306033	-0.214019	-2.51176	10.1567	53.1854	74.912	8.28938
France	4	1996	-2.98196	0.442989	-0.0715518	0.35968	-0.166907	-2.41775	10.1699	53.4062	75.082	8.34092
France	4	1997	-2.94462	0.493661	-0.0628683	0.336521	-0.175472	-2.35278	10.2251	53.5817	75.25	8.30628
France	4	1998	-3.09423	0.503388	-0.0726026	0.283295	-0.181207	-2.56136	10.2886	53.6943	75.417	8.33126
France	4	1999	-3.02224	0.584031	-0.0699087	0.28369	-0.167471	-2.3919	10.3276	53.749	75.614	8.32446
France	4	2000	-3.07473	0.538484	-0.0666264	0.19086	-0.172205	-2.58422	10.3726	53.7619	75.871	8.32736
France	4	2001	-3.1059	0.41807	-0.0750634	0.276963	-0.152802	-2.63873	10.396	53.8697	76.127	8.35373
France	4	2002	-3.00143	0.411732	-0.0878418	0.337076	-0.145097	-2.48556	10.3971	53.8978	76.38	8.34889
France	4	2003	-3.09992	0.486733	-0.0883209	0.365491	-0.126406	-2.46242	10.3599	53.8726	76.632	8.35959
France	4	2004	-3.21368	0.41121	-0.0768622	0.35381	-0.130136	-2.65566	10.3786	53.8212	76.883	8.36677
France	4	2005	-3.25277	0.458613	-0.0869559	0.363016	-0.135502	-2.6536	10.4236	53.7649	77.13	8.36338
France	4	2006	-3.26333	0.406589	-0.0844204	0.325886	-0.132486	-2.74776	10.4603	53.8319	77.377	8.34018
France	4	2007	-3.31727	0.319092	-0.066312	0.298872	-0.133911	-2.89952	10.5041	53.863	77.621	8.32252
France	4	2008	-3.30563	0.294509	-0.0540284	0.327734	-0.130706	-2.86812	10.5102	53.9367	77.868	8.32132
France	4	2009	-2.98226	0.325603	-0.0597046	0.368678	-0.132024	-2.47971	10.4861	54.1689	78.117	8.27218
France	4	2010	-3.10347	0.454409	-0.0633986	0.361127	-0.123505	-2.47484	10.5168	54.6309	78.369	8.29825
France	4	2011	-3.03962	0.412189	-0.0713346	0.385845	-0.0992842	-2.41221	10.5417	55.3352	78.622	8.25507
France	4	2012	-2.86726	0.340371	-0.0588563	0.415013	-0.106006	-2.27674	10.535	56.2594	78.878	8.25236
France	4	2013	-2.83868	0.379106	-0.075591	0.42615	-0.106273	-2.21529	10.5539	57.3244	79.135	8.25154
France	4	2014	-2.62491	0.354699	-0.093535	0.416244	-0.101123	-2.04863	10.5496	58.381	79.394	8.20497
France	4	2015	-2.64717	0.404877	-0.0863896	0.442203	-0.0925843	-1.97906	10.5776	59.3207	79.655	8.21393
France	4	2016	-2.6459	0.315004	-0.0977988	0.443731	-0.0846291	-2.06959	10.5922	60.076	79.917	0
Germany	5	1995	-4.07496	-0.190308	0.00576119	0.167827	-0.138825	-4.2305	10.3078	46.4859	73.922	8.32353
Germany	5	1996	-4.09636	-0.150578	0.00766921	0.201641	-0.122637	-4.16026	10.318	46.6495	74.133	8.35386
Germany	5	1997	-3.95293	-0.157259	0.0117423	0.190682	-0.122253	-4.03002	10.3568	46.8006	74.342	8.34364
Germany	5	1998	-3.9663	-0.126524	0.00256257	0.177578	-0.117938	-4.03062	10.4002	46.9541	74.551	8.33742
Germany	5	1999	-3.66259	-0.0902243	0.0194904	0.188358	-0.0913231	-3.63629	10.4401	47.1448	74.758	8.31384
Germany	5	2000	-3.68835	-0.0506748	0.0144696	0.0549104	-0.102081	-3.77173	10.4469	47.4074	74.965	8.31729
Germany	5	2001	-3.72872	-0.0547715	0.0195522	0.204711	-0.0707688	-3.63	10.457	47.916	75.17	8.34517
Germany	5	2002	-3.62714	-0.0731687	0.0201336	0.224793	-0.0870585	-3.54244	10.4492	48.4284	75.374	8.32079
Germany	5	2003	-3.62994	-0.110365	0.0156032	0.150352	-0.090577	-3.66492	10.4507	48.9446	75.577	8.31496
Germany	5	2004	-3.54199	-0.128475	0.0216247	0.160527	-0.0895293	-3.57785	10.4702	49.444	75.779	8.32225
Germany	5	2005	-3.51854	-0.0966839	0.0152393	0.201667	-0.0845841	-3.4829	10.4811	49.8912	75.98	8.31544
Germany	5	2006	-3.68359	-0.119175	0.00861945	0.126006	-0.093268	-3.76141	10.5227	50.3647	76.179	8.34395
Germany	5	2007	-3.51534	-0.204257	0.0162367	0.0409342	-0.102041	-3.76447	10.5748	50.803	76.378	8.2905
Germany	5	2008	-3.59287	-0.139858	0.021893	0.21576	-0.100326	-3.5954	10.5963	51.201	76.575	8.30322
Germany	5	2009	-3.38435	-0.123018	0.014384	0.32126	-0.0949935	-3.26672	10.5566	51.532	76.771	8.24025
Germany	5	2010	-3.6944	-0.115346	0.0211212	0.198966	-0.0976657	-3.68733	10.6086	51.7937	76.966	8.29332
Germany	5	2011	-3.59914	-0.189811	0.0215027	0.177646	-0.112324	-3.70213	10.6584	52.0098	77.16	8.26096
Germany	5	2012	-3.42731	-0.162637	0.0248325	0.206931	-0.101669	-3.45985	10.6669	52.0954	77.17	8.2628
Germany	5	2013	-3.45247	-0.110508	0.0283843	0.185975	-0.109692	-3.45831	10.6783	52.1321	77.18	8.27882
Germany	5	2014	-3.2538	-0.115936	0.0243381	0.18267	-0.108454	-3.27118	10.7033	52.2447	77.19	8.23734
Germany	5	2015	-3.22631	-0.0966433	0.0284792	0.151354	-0.117594	-3.26072	10.7363	52.5216	77.2	8.24736
Germany	5	2016	-3.18857	-0.105888	0.0210572	0.174076	-0.123528	-3.22285	10.7684	52.9146	77.224	0
Greece	6	1995	-2.93632	-0.00780579	0.0561325	0.029511	-0.271499	-3.12998	9.85076	46.4543	72.119	7.67189
Greece	6	1996	-3.11744	-0.0255184	0.0518944	-0.00145124	-0.293136	-3.38566	9.88333	46.4198	72.239	7.69898
Greece	6	1997	-2.92591	-0.0943845	0.0543831	-0.130802	-0.252296	-3.34901	9.95675	46.2654	72.358	7.73287
Greece	6	1998	-3.07245	-0.120893	0.0603995	-0.089874	-0.295068	-3.51788	10.0157	46.0834	72.478	7.77896
Greece	6	1999	-2.9643	-0.0421131	0.0711785	-0.163481	-0.34914	-3.44786	10.0294	45.9961	72.597	7.77908
Greece	6	2000	-3.61491	-0.266366	0.068626	-0.172083	-0.685235	-4.66997	10.0488	46.0517	72.716	7.8267
Greece	6	2001	-3.56837	-0.0425875	0.0493891	-0.150861	-0.256108	-3.96854	10.0878	46.4806	72.913	7.85481
Greece	6	2002	-3.33456	-0.196097	0.0442341	-0.0964437	-0.242658	-3.82553	10.1332	47.0139	73.303	7.8624
Greece	6	2003	-3.66419	-0.278863	0.0415706	-0.175595	-0.252382	-4.32946	10.1672	47.5939	73.689	7.8885
Greece	6	2004	-3.84456	-0.267716	0.0700111	-0.137327	-0.243263	-4.42286	10.2288	48.0988	74.073	7.90525
Greece	6	2005	-3.82337	-0.175194	0.0463948	-0.13436	-0.232057	-4.31859	10.2195	48.4596	74.452	7.92047
Greece	6	2006	-3.98183	-0.204597	0.0529418	-0.212945	-0.259717	-4.60615	10.3036	49.2508	74.827	7.91667
Greece	6	2007	-4.24813	-0.301905	0.0485223	-0.134967	-0.255734	-4.89221	10.3283	49.9432	75.199	7.9138
Greece	6	2008	-3.84388	-0.223088	0.0485065	-0.116833	-0.244666	-4.37996	10.3526	50.5855	75.568	7.91772
Greece	6	2009	-3.67549	-0.159524	0.0526008	-0.074312	-0.257333	-4.11406	10.3264	51.2545	75.932	7.88219
Greece	6	2010	-3.18767	-0.192841	0.0812479	-0.0615828	-0.269327	-3.63018	10.2424	51.9914	76.292	7.81686
Greece	6	2011	-2.91596	-0.199667	0.0892571	-0.0298035	-0.240077	-3.29625	10.1428	52.5495	76.649	7.78645
Greece	6	2012	-2.60212	-0.0778072	0.0919632	-0.0404494	-0.207796	-2.83621	10.0915	53.1024	77.004	7.78457
Greece	6	2013	-2.4311	-0.0985023	0.0863973	-0.0404412	-0.193149	-2.6768	10.092	53.6548	77.355	7.66294
Greece	6	2014	-2.44203	-0.133899	0.0759639	-0.0333836	-0.194228	-2.72758	10.1014	54.2089	77.702	7.66101
Greece	6	2015	-2.45391	-0.0907008	0.0807306	-0.0324754	-0.199205	-2.69556	10.1139	54.7529	78.046	7.68803
Greece	6	2016	-2.46533	-0.0845935	0.0726368	-0.0308394	-0.201989	-2.71012	10.1152	55.0033	78.387	0
Italy	7	1995	-3.13175	-0.397115	-0.047486	-0.120078	-0.411162	-4.10759	10.2513	46.1177	66.922	7.93715
Italy	7	1996	-3.03427	-0.380075	-0.0448537	-0.078605	-0.413141	-3.95094	10.2677	46.4829	66.982	7.936
Italy	7	1997	-3.16214	-0.375872	-0.0447644	-0.131825	-0.4602	-4.1748	10.3168	46.8622	67.042	7.94959
Italy	7	1998	-3.28869	-0.400821	-0.0448723	-0.151534	-0.45521	-4.34113	10.3704	47.2775	67.102	7.97692
Italy	7	1999	-3.30579	-0.37586	-0.0426238	-0.198864	-0.441204	-4.36434	10.3959	47.7734	67.162	7.99204
Italy	7	2000	-3.3648	-0.384132	-0.0365289	-0.20519	-0.516876	-4.50753	10.4167	48.3877	67.222	8.01042
Italy	7	2001	-3.35522	-0.409805	-0.0476618	-0.187194	-0.391808	-4.39169	10.4119	48.8581	67.282	8.01322
Italy	7	2002	-3.39475	-0.438262	-0.0446947	-0.182108	-0.375324	-4.43514	10.3958	49.4387	67.382	8.01871
Italy	7	2003	-3.60564	-0.453136	-0.063093	-0.181002	-0.370465	-4.67333	10.3922	50.069	67.501	8.06102
Italy	7	2004	-3.65919	-0.435126	-0.0607057	-0.193834	-0.363336	-4.7122	10.3924	50.648	67.62	8.06147
Italy	7	2005	-3.68745	-0.401525	-0.0697408	-0.195989	-0.355642	-4.71034	10.4031	51.1183	67.738	8.07548
Italy	7	2006	-3.7222	-0.433026	-0.078194	-0.191617	-0.392749	-4.81779	10.4481	51.5793	67.856	8.06331
Italy	7	2007	-3.71162	-0.43012	-0.0705206	-0.182268	-0.342942	-4.73747	10.4877	51.8726	67.974	8.05502
Italy	7	2008	-3.47551	-0.386737	-0.0629365	-0.131225	-0.314052	-4.37046	10.508	52.0727	68.092	8.03514
Italy	7	2009	-3.17957	-0.432607	-0.0659549	-0.0810239	-0.293552	-4.05271	10.4808	52.3136	68.209	7.96204
Italy	7	2010	-3.36578	-0.451279	-0.0639201	-0.132894	-0.317111	-4.33098	10.4895	52.6849	68.327	7.98296
Italy	7	2011	-3.24856	-0.415017	-0.0608669	-0.128247	-0.321102	-4.1738	10.5104	53.2069	68.444	7.94747
Italy	7	2012	-2.84324	-0.381752	-0.0555003	-0.107563	-0.276898	-3.66496	10.4986	53.7984	68.684	7.90444
Italy	7	2013	-2.68409	-0.371431	-0.0583122	-0.10477	-0.273487	-3.49209	10.4817	54.418	68.979	7.85534
Italy	7	2014	-2.566	-0.448423	-0.0669395	-0.105928	-0.275237	-3.46253	10.4735	54.9799	69.272	7.78924
Italy	7	2015	-2.64545	-0.411972	-0.0715525	-0.107444	-0.2681	-3.50451	10.5093	55.434	69.565	7.81672
Italy	7	2016	-2.62445	-0.416562	-0.0769245	-0.109468	-0.267515	-3.49492	10.5576	55.8592	69.855	0
Luxembourg	8	1995	-10.4741	-0.465708	-0.0541999	-0.419623	-0.406875	-11.8205	10.8334	47.8062	82.893	8.94968
Luxembourg	8	1996	-11.2904	-0.308136	-0.0709213	-0.185237	-0.410081	-12.2648	10.8582	48.4028	82.825	8.95043
Luxembourg	8	1997	-12.1336	-0.418435	-0.0801496	-0.255627	-0.469721	-13.3576	10.9111	48.796	82.779	8.91057
Luxembourg	8	1998	-11.3733	-0.443056	-0.107635	0.010189	-0.401719	-12.3156	10.9577	49.0435	82.893	8.86318
Luxembourg	8	1999	-12.4147	-0.355288	-0.100581	-0.36353	-0.43421	-13.6683	11.0734	49.2026	83.448	8.8911
Luxembourg	8	2000	-11.7253	-0.457957	-0.10458	-0.58406	-0.310349	-13.1822	11.1281	49.2931	84.216	8.94596
Luxembourg	8	2001	-11.1724	-0.615202	-0.112233	-0.409698	-0.338873	-12.6484	11.0982	49.4896	84.843	8.98505
Luxembourg	8	2002	-11.9506	-0.564747	-0.107173	-1.0196	-0.364847	-14.007	11.1042	49.6022	85.299	9.01247
Luxembourg	8	2003	-12.742	-0.567208	-0.122533	-2.08761	-0.430314	-15.9497	11.1144	49.6157	85.743	9.05363
Luxembourg	8	2004	-12.7886	-0.73034	-0.115948	0.338069	-0.562364	-13.8592	11.1575	49.5244	86.177	9.14713
Luxembourg	8	2005	-13.0302	-0.658064	-0.113512	0.033214	-0.578208	-14.3467	11.2269	49.35	86.598	9.15153
Luxembourg	8	2006	-12.7907	-0.519668	-0.126913	0.46429	-0.643695	-13.6166	11.3185	48.6883	87.009	9.12375
Luxembourg	8	2007	-10.3169	-0.62336	-0.116271	-1.02287	-0.626784	-12.7062	11.377	47.9916	87.409	9.07954
Luxembourg	8	2008	-11.8359	-0.659655	-0.115395	-0.543832	-0.667314	-13.8221	11.3976	47.3244	87.8	9.06094
Luxembourg	8	2009	-10.3442	-0.707983	-0.11255	-0.604402	-0.638255	-12.4074	11.3124	46.7464	88.178	8.98114
Luxembourg	8	2010	-11.4174	-0.698292	-0.130008	-1.14675	-0.647929	-14.0404	11.3626	46.2781	88.547	9.02756
Luxembourg	8	2011	-10.9396	-0.703911	-0.127432	-1.31481	-0.686222	-13.772	11.4331	45.6813	88.906	8.99422
Luxembourg	8	2012	-10.5262	-0.719478	-0.140495	-0.487434	-0.670037	-12.5436	11.4232	45.1232	89.249	8.95185
Luxembourg	8	2013	-10.2877	-0.723735	-0.1368	-0.310917	-0.651139	-12.1103	11.4126	44.5956	89.574	8.89729
Luxembourg	8	2014	-9.57122	-0.735411	-0.147906	-0.271957	-0.630976	-11.3575	11.4612	44.0883	89.884	8.83362
Luxembourg	8	2015	-9.76837	-0.655755	-0.144317	-0.274646	-0.612071	-11.4552	11.488	43.6207	90.179	8.78698
Luxembourg	8	2016	-10.0265	-0.601139	-0.147853	-0.337073	-0.561388	-11.674	11.5007	43.4345	90.46	0
Netherlands	9	1995	-3.92216	-1.06677	0.333227	-0.327844	-0.301336	-5.28489	10.2903	45.9892	72.809	8.47228
Netherlands	9	1996	-4.09255	-0.810209	0.381469	-0.370985	-0.296079	-5.18836	10.3296	46.3242	73.64	8.52019
Netherlands	9	1997	-3.63888	-0.504189	0.382849	-0.405443	-0.293648	-4.45931	10.4053	46.6042	74.453	8.48379
Netherlands	9	1998	-4.22686	-0.668114	0.347043	-0.503651	-0.278657	-5.33024	10.4797	46.8254	75.25	8.48517
Netherlands	9	1999	-4.17102	-0.74723	0.334937	-0.483903	-0.328531	-5.39574	10.5397	47.0058	76.03	8.46173
Netherlands	9	2000	-4.39419	-0.678604	0.318697	-0.315542	-0.27195	-5.34159	10.5958	47.1669	76.795	8.4636
Netherlands	9	2001	-4.29979	-0.897862	0.297037	-0.379054	-0.328245	-5.60791	10.6032	47.333	77.83	8.48456
Netherlands	9	2002	-4.17378	-0.894287	0.342801	-0.385333	-0.359486	-5.47009	10.602	47.5389	79.113	8.49152
Netherlands	9	2003	-4.33337	-0.941484	0.328074	-0.317695	-0.396801	-5.66127	10.5652	47.7592	80.341	8.52126
Netherlands	9	2004	-4.44265	-0.857271	0.389498	-0.31082	-0.400402	-5.62164	10.5818	47.9383	81.514	8.53422
Netherlands	9	2005	-4.7753	-0.806951	0.352289	-0.339117	-0.367268	-5.93635	10.6233	48.0473	82.63	8.51508
Netherlands	9	2006	-5.00351	-0.780556	0.314153	-0.313769	-0.414358	-6.19804	10.6772	48.3229	83.636	8.5021
Netherlands	9	2007	-4.84777	-0.844363	0.295766	-0.367448	-0.449354	-6.21317	10.7367	48.438	84.539	8.4988
Netherlands	9	2008	-4.97587	-0.727105	0.302689	-0.451072	-0.433289	-6.28465	10.7721	48.5127	85.402	8.48632
Netherlands	9	2009	-3.60582	-0.725305	0.288472	-0.316468	-0.488559	-4.84768	10.7196	48.7238	86.288	8.46001
Netherlands	9	2010	-4.47424	-0.743746	0.268005	-0.314573	-0.454792	-5.71935	10.7265	49.1641	87.134	8.52224
Netherlands	9	2011	-4.27873	-0.818041	0.287671	-0.279716	-0.442954	-5.53177	10.7437	49.7526	87.879	8.44176
Netherlands	9	2012	-4.55613	-0.766002	0.293867	-0.26989	-0.473926	-5.77208	10.7432	50.5799	88.588	8.44382
Netherlands	9	2013	-4.03846	-0.737942	0.304545	-0.262698	-0.468218	-5.20278	10.7525	51.53	89.187	8.43385
Netherlands	9	2014	-3.95507	-0.930514	0.342753	-0.269823	-0.462263	-5.27492	10.7257	52.4011	89.69	8.37229
Netherlands	9	2015	-3.67881	-0.814655	0.387304	-0.25613	-0.508849	-4.87114	10.7768	53.0826	90.173	8.35068
Netherlands	9	2016	-2.75737	-0.914716	0.402459	-0.22232	-0.517045	-4.00899	10.7786	53.7233	90.635	0
Portugal	10	1995	-2.3519	-1.02497	-0.268759	0.592275	-0.196804	-3.25015	9.79337	48.749	51.109	7.60789
Portugal	10	1996	-2.27439	-0.694337	-0.291317	0.629268	-0.139769	-2.77055	9.82401	48.4797	51.77	7.5943
Portugal	10	1997	-2.51823	-0.571404	-0.249706	0.635404	-0.169042	-2.87298	9.89553	48.1964	52.428	7.6418
Portugal	10	1998	-2.69851	-0.642216	-0.268964	0.620174	-0.170344	-3.15986	9.96118	47.9378	53.086	7.71426
Portugal	10	1999	-2.88711	-0.669594	-0.252553	0.650507	-0.208184	-3.36693	10.0174	47.7626	53.743	7.77926
Portugal	10	2000	-2.89511	-0.627391	-0.220609	0.457469	-0.210503	-3.49615	10.0459	47.7087	54.399	7.77909
Portugal	10	2001	-2.93786	-0.649424	-0.237648	0.613852	-0.177107	-3.38819	10.0486	47.7408	55.044	7.77956
Portugal	10	2002	-3.00207	-0.635098	-0.241257	0.692106	-0.189359	-3.37568	10.0561	47.8768	55.666	7.815
Portugal	10	2003	-2.79586	-0.62215	-0.262673	0.721427	-0.186436	-3.14569	10.0599	48.0938	56.287	7.78354
Portugal	10	2004	-2.90627	-0.598058	-0.25398	0.583392	-0.185843	-3.36076	10.0803	48.3093	56.907	7.80913
Portugal	10	2005	-3.04488	-0.641268	-0.264187	0.613376	-0.184938	-3.5219	10.1206	48.4567	57.522	7.83162
Portugal	10	2006	-2.90495	-0.585253	-0.307954	0.694712	-0.223316	-3.32676	10.1725	49.0765	58.137	7.77918
Portugal	10	2007	-2.83628	-0.63127	-0.329605	0.688098	-0.26261	-3.37167	10.2044	49.5662	58.749	7.78423
Portugal	10	2008	-2.79522	-0.615466	-0.275063	0.690959	-0.222979	-3.21777	10.213	49.9453	59.359	7.75674
Portugal	10	2009	-2.73555	-0.64441	-0.271304	0.761025	-0.210681	-3.10092	10.2076	50.2901	59.964	7.74241
Portugal	10	2010	-2.61262	-0.659685	-0.276089	0.556714	-0.224969	-3.21665	10.2376	50.6703	60.567	7.70645
Portugal	10	2011	-2.41159	-0.621803	-0.254806	0.68526	-0.195421	-2.79836	10.1965	51.1536	61.167	7.67971
Portugal	10	2012	-2.18351	-0.617763	-0.240816	0.737708	-0.193395	-2.49778	10.1716	51.6773	61.763	7.62022
Portugal	10	2013	-2.12383	-0.580981	-0.247075	0.750363	-0.216545	-2.41807	10.1983	52.2546	62.352	7.62942
Portugal	10	2014	-2.10764	-0.571155	-0.250531	0.687362	-0.224091	-2.46606	10.2111	52.8664	62.936	7.61801
Portugal	10	2015	-2.28575	-0.590312	-0.246772	0.63499	-0.213675	-2.70152	10.26	53.4889	63.514	7.66467
Portugal	10	2016	-2.29106	-0.569727	-0.28854	0.531702	-0.219858	-2.83748	10.1993	53.9372	64.086	0
Spain	11	1995	-2.6025	-0.471977	-0.36372	-0.0317286	-0.0784748	-3.5484	9.95161	46.5719	75.856	7.83877
Spain	11	1996	-2.48274	-0.293099	-0.334288	-0.027385	-0.0590981	-3.19661	10.0211	46.2355	75.938	7.81977
Spain	11	1997	-2.67898	-0.160519	-0.348485	-0.046965	-0.0734975	-3.30844	10.0952	46.0117	76.019	7.87651
Spain	11	1998	-2.85664	-0.201045	-0.366952	-0.117567	-0.0691066	-3.61131	10.1307	45.8852	76.1	7.92162
Spain	11	1999	-3.011	-0.276892	-0.37089	-0.205911	-0.0727793	-3.93747	10.1712	45.8134	76.181	7.96484
Spain	11	2000	-3.16026	-0.190054	-0.344826	-0.0983723	-0.0738491	-3.86736	10.1934	45.7805	76.262	8.00762
Spain	11	2001	-3.18126	-0.204396	-0.333901	-0.079258	-0.052732	-3.85155	10.2189	45.4236	76.343	8.02646
Spain	11	2002	-3.31567	-0.286762	-0.306945	-0.100813	-0.0572346	-4.06743	10.2288	45.1223	76.533	8.04169
Spain	11	2003	-3.47482	-0.178807	-0.341813	-0.104763	-0.0583423	-4.15854	10.2633	44.9037	76.778	8.05745
Spain	11	2004	-3.55514	-0.210182	-0.303445	-0.0965251	-0.061363	-4.22665	10.3135	44.7851	77.022	8.08287
Spain	11	2005	-3.67052	-0.385491	-0.296913	-0.0843524	-0.065538	-4.50281	10.3977	44.7695	77.263	8.08684
Spain	11	2006	-3.60749	-0.325689	-0.343654	-0.135915	-0.0661775	-4.47893	10.4566	45.1216	77.502	8.06905
Spain	11	2007	-3.6766	-0.21331	-0.274326	-0.150986	-0.0811693	-4.3964	10.4611	45.5187	77.74	8.06465
Spain	11	2008	-3.57955	-0.186765	-0.289727	-0.0252484	-0.0518117	-4.1331	10.423	45.9495	77.976	8.01511
Spain	11	2009	-2.81943	-0.268926	-0.273108	0.0553817	-0.0658267	-3.37191	10.4036	46.3681	78.21	7.92215
Spain	11	2010	-2.69966	-0.127943	-0.281254	0.0815654	-0.0604206	-3.08771	10.3874	46.73	78.442	7.91676
Spain	11	2011	-2.51269	-0.0886791	-0.288232	0.121075	-0.0574963	-2.82603	10.3759	47.6538	78.673	7.89718
Spain	11	2012	-2.34193	-0.116959	-0.266682	0.151281	-0.0506559	-2.62494	10.3682	48.4075	78.902	7.89483
Spain	11	2013	-2.17901	-0.0792186	-0.308445	0.145819	-0.0540579	-2.47491	10.3862	49.0738	79.133	7.82888
Spain	11	2014	-2.20174	-0.0107775	-0.315601	0.123	-0.0483663	-2.45348	10.442	49.7564	79.366	7.8098
Spain	11	2015	-2.25777	-0.141117	-0.297046	0.0788852	-0.0431815	-2.66023	10.4803	50.4962	79.602	7.85218
Spain	11	2016	-2.26721	-0.134393	-0.300777	0.086329	-0.0504238	-2.66648	9.91905	50.7748	79.84	0
Sweden	12	1995	-3.36877	-0.210718	2.22907	5.45594	-0.0136808	4.09185	10.2636	57.1087	83.824	8.6486
Sweden	12	1996	-3.5544	-0.197449	2.22285	6.43767	-0.0507795	4.85789	10.2818	57.1649	83.914	8.66993
Sweden	12	1997	-3.45186	-0.0709445	2.22919	6.07242	-0.0387808	4.74003	10.3286	56.9376	83.942	8.6433
Sweden	12	1998	-3.51579	-0.0816586	2.23941	6.07128	-0.0560099	4.65723	10.3846	56.5073	83.97	8.66037
Sweden	12	1999	-3.36874	-0.129785	2.22765	6.22214	-0.0710515	4.88022	10.4478	56.0221	83.998	8.64144
Sweden	12	2000	-3.40787	-0.0959137	2.25014	5.77265	-0.0444179	4.47459	10.496	55.5839	84.026	8.58675
Sweden	12	2001	-3.29516	-0.0999486	2.24416	5.81123	-0.0643659	4.59592	10.4774	54.7765	84.071	8.64476
Sweden	12	2002	-3.52763	-0.171108	2.22794	5.64139	-0.111895	4.05869	10.4662	54.2566	84.133	8.66598
Sweden	12	2003	-3.74144	-0.107544	2.16834	5.73134	-0.13161	3.91907	10.4748	53.9022	84.196	8.63949
Sweden	12	2004	-3.58493	-0.133093	2.18754	6.08002	-0.12665	4.42288	10.5069	53.5497	84.258	8.67374
Sweden	12	2005	-3.57704	-0.137218	2.18033	3.82033	-0.151752	2.13465	10.5118	53.1656	84.319	8.65017
Sweden	12	2006	-3.58906	-0.226583	2.18058	6.6977	-0.159884	4.90275	10.5848	53.233	84.43	8.61778
Sweden	12	2007	-3.68695	-0.195329	2.13744	5.4043	-0.164319	3.49514	10.661	53.0615	84.588	8.60742
Sweden	12	2008	-3.62326	-0.210107	2.13341	5.9374	-0.181961	4.05548	10.6695	52.8333	84.746	8.59044
Sweden	12	2009	-3.10252	-0.214847	2.14841	6.15996	-0.17549	4.81551	10.6083	52.8313	84.902	8.49356
Sweden	12	2010	-3.64135	-0.24623	2.13581	5.25952	-0.193289	3.31445	10.65	53.2015	85.056	8.59931
Sweden	12	2011	-3.68278	-0.267413	2.09777	5.35319	-0.207636	3.29313	10.6839	53.8813	85.297	8.57067
Sweden	12	2012	-3.38848	-0.263419	2.07227	5.39341	-0.211843	3.60193	10.6893	54.8938	85.62	8.56969
Sweden	12	2013	-3.31354	-0.267491	2.05537	5.36939	-0.213095	3.63063	10.6814	56.1561	85.936	8.54608
Sweden	12	2014	-3.2971	-0.195993	2.02871	4.91947	-0.214173	3.24092	10.6794	57.4185	86.247	8.51046
Sweden	12	2015	-3.12661	-0.151166	2.02523	5.02181	-0.202278	3.56698	10.7344	58.4857	86.553	8.53754
Sweden	12	2016	-3.2797	-0.186099	2.01506	4.75136	-0.207498	3.09313	10.741	59.308	86.852	0
United Kingdom	13	1995	-3.51334	-0.272349	0.1661	-0.394173	-0.174719	-4.18848	10.1594	54.6815	78.353	8.22389
United Kingdom	13	1996	-3.68085	-0.222489	0.170876	-0.404342	-0.194323	-4.33113	10.2126	54.6964	78.413	8.26354
United Kingdom	13	1997	-3.47448	-0.178565	0.165893	-0.433764	-0.207729	-4.12865	10.2745	54.5693	78.472	8.23236
United Kingdom	13	1998	-3.59553	-0.170373	0.182696	-0.403406	-0.173657	-4.16027	10.313	54.3294	78.532	8.23936
United Kingdom	13	1999	-3.53012	-0.211299	0.19334	-0.413253	-0.169209	-4.13054	10.3453	54.0207	78.591	8.23856
United Kingdom	13	2000	-3.81594	-0.194406	0.209923	-0.410992	-0.187794	-4.39921	10.3958	53.6701	78.651	8.239
United Kingdom	13	2001	-4.21725	-0.304464	0.200954	-0.438925	-0.199724	-4.95941	10.4117	53.3141	78.751	8.23878
United Kingdom	13	2002	-3.95786	-0.266051	0.20701	-0.436652	-0.189262	-4.64281	10.4236	52.8723	79.047	8.21226
United Kingdom	13	2003	-3.93479	-0.241832	0.221841	-0.447092	-0.219348	-4.62122	10.4484	52.3945	79.339	8.22459
United Kingdom	13	2004	-4.05763	-0.309485	0.218346	-0.458935	-0.236034	-4.84373	10.4816	51.9364	79.629	8.21459
United Kingdom	13	2005	-4.12907	-0.283707	0.208478	-0.473479	-0.204464	-4.88224	10.4965	51.5458	79.915	8.21239
United Kingdom	13	2006	-4.17335	-0.316665	0.197993	-0.464548	-0.206267	-4.96284	10.5283	51.372	80.199	8.18836
United Kingdom	13	2007	-4.22637	-0.316333	0.209726	-0.47934	-0.199083	-5.0114	10.543	51.2671	80.479	8.1437
United Kingdom	13	2008	-3.97466	-0.303413	0.208425	-0.405106	-0.191881	-4.66663	10.5381	51.2666	80.757	8.12029
United Kingdom	13	2009	-4.0649	-0.292164	0.216046	-0.357792	-0.162909	-4.66171	10.4751	51.3955	81.031	8.05376
United Kingdom	13	2010	-3.55756	-0.225033	0.223617	-0.385435	-0.173331	-4.11775	10.5091	51.665	81.302	8.08043
United Kingdom	13	2011	-3.27555	-0.232379	0.216335	-0.360638	-0.155142	-3.80737	10.5076	52.3437	81.57	7.99704
United Kingdom	13	2012	-3.2335	-0.263673	0.213786	-0.313383	-0.157107	-3.75388	10.5256	53.0425	81.837	8.02055
United Kingdom	13	2013	-3.21602	-0.31544	0.210063	-0.318675	-0.148765	-3.78884	10.5512	53.7606	82.102	8.00226
United Kingdom	13	2014	-3.00174	-0.270072	0.215452	-0.345844	-0.126484	-3.52869	10.5712	54.4638	82.365	7.92924
United Kingdom	13	2015	-2.90439	-0.255055	0.217081	-0.345565	-0.130633	-3.41856	10.6141	55.111	82.626	7.92462
United Kingdom	13	2016	-2.79004	-0.230554	0.203965	-0.339281	-0.12301	-3.27892	10.6269	55.6374	82.886	0

## Sheet: Source
Variable	Explanation	Source
CBS	Cropland balance sheet (gha per person)	Global Footprint Network
FBS	Fishing grounds balance sheet (gha per person)	Global Footprint Network
FOBS	Forest products balance sheet (gha per person)	Global Footprint Network
GBS	Grazing land balance sheet (gha per person)	Global Footprint Network
EBS	Ecological balance sheet (gha per person)	Global Footprint Network
LnGDPper	Ln(Expenditure-side real GDP at chained PPPs (in mil. 2011US$)/Population (in millions))	Penn World Table
LnEnergy	Energy use (kg of oil equivalent per capita) (in Log)	World Data Bank
Urbanization	Urban population (% of total population)	World Data Bank
Dependency	Age dependency ratio (% of working-age population)	World Data Bank
